# Supplementary material
Source: HighWire-hosted journal article supplement (https://diabetes.diabetesjournals.org/content/suppl/2005/03/25/54.4.1233)
Supplement: pg1233MordesOnlineAppendix.pdf [file pg1233MordesOnlineAppendix.pdf]

## APPENDIX

## Appendix: Figure 3

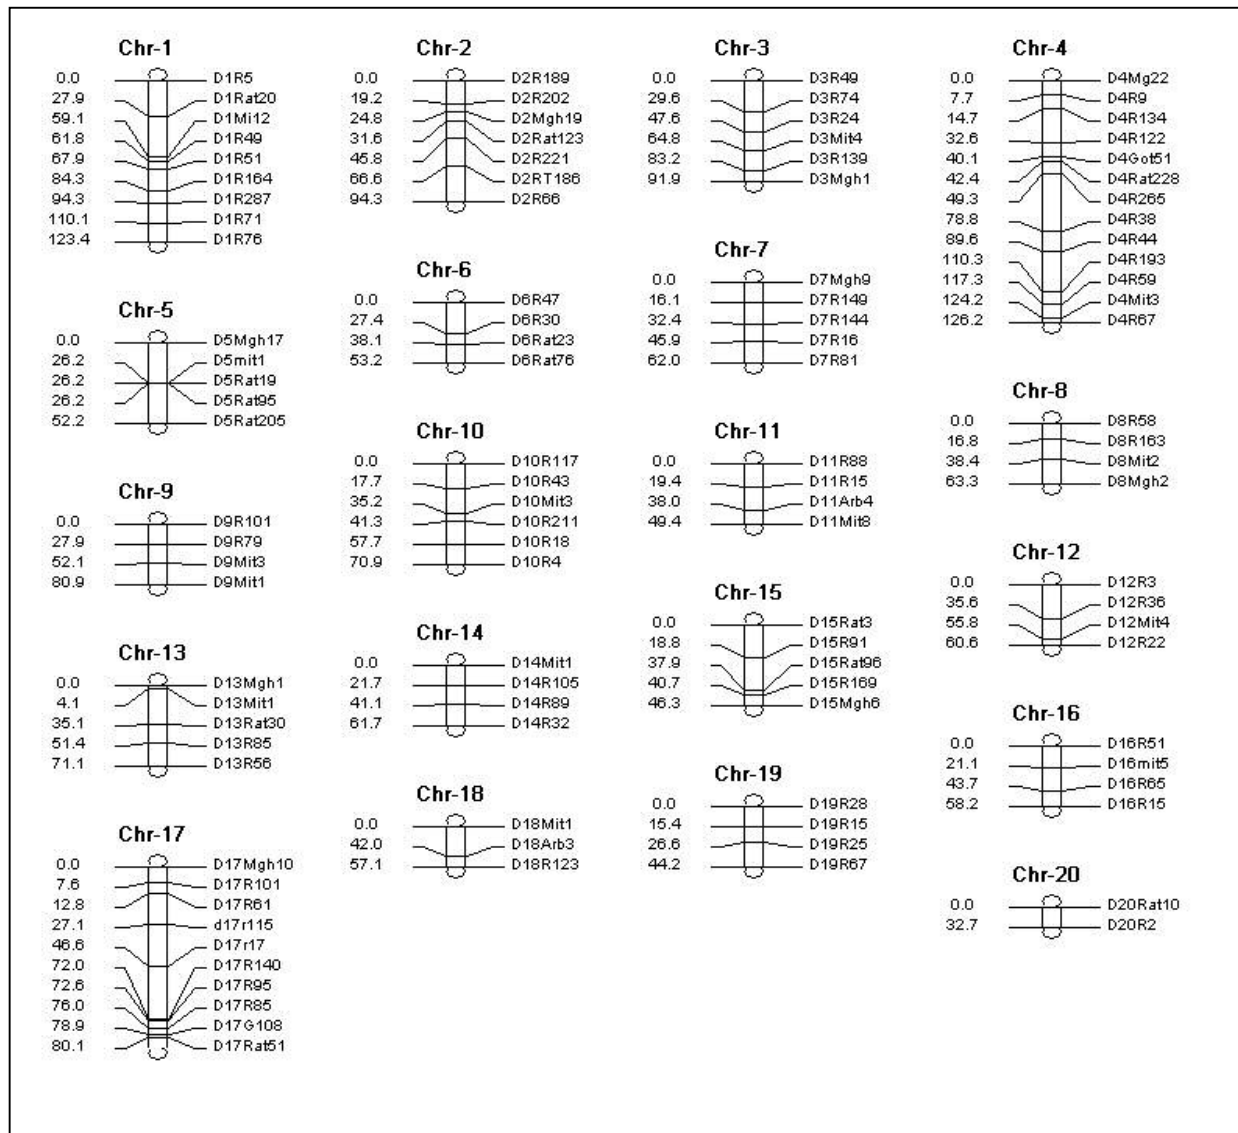

Legend to Figure 3: Polymorphic markers used in this study. DNA samples and microsatellite markers. Genomic DNA was prepared using one of two protocols. Snap-frozen livers were ground on dry ice and the dispersed tissue was treated with Proteinase K in the presence of 10% sarkosyl and 0.5M EDTA (pH 8.0). DNA was purified from these digests by phenol-chloroform extraction and dialysis against Tris EDTA (0.01M Tris/0.001M EDTA, pH 7.4). Alternatively, genomic DNA was extracted from rat tail snips using the QIAamp Tissue kit (Qiagen, Stanford,

CA) according to the manufacturer's instructions. Most microsatellite primers used in this study are available from Research Genetics, Inc. (Huntsville, AL). The general map location of these microsatellites was taken from our own segregating backcrosses, and from maps published by the Rat Genome Database (<http://www.rgd.mcw.edu>) and by Dr. R. Wilder and Dr. E. Remmers ([www.nih.gov/niams/scientific/ratgbase/index.htm](http://www.nih.gov/niams/scientific/ratgbase/index.htm)). Additional primer pairs were developed from unique sequences flanking short sequence repeats discovered by inspection of repeat regions in the *Iddm4* and *ART2* intervals (UCSC genome database). Primers found to be polymorphic between parental strains were used. The position of markers on the genetic map was established by inspection of the data set and conventional calculation methods to establish meiotic map distances, which are expressed in megabases (Mb) according to the rat genome sequence, June 2003 build (<http://genome.ucsu.edu>). Chr: chromosome.

**Appendix Table 3****TABLE 3****FREQUENCY OF DIABETES AS A FUNCTION OF *Iddm4* AND *Iddm20* GENOTYPE**

| <i>Iddm4</i> →  | d           | h           | w           | d           | h           | w           |
|-----------------|-------------|-------------|-------------|-------------|-------------|-------------|
| <i>Iddm20</i> ↓ | <i>sick</i> | <i>sick</i> | <i>sick</i> | <i>well</i> | <i>well</i> | <i>well</i> |
| d               | 5           | 13          | 1           | 4           | 9           | 6           |
| h               | 16          | 19          | 0           | 16          | 32          | 24          |
| w               | 2           | 3           | 0           | 6           | 24          | 10          |

Table 3: As documented by the low frequency of diabetes in the shaded cells, diabetes susceptibility in KRV-infected rats requires *Iddm20*, *Iddm4*, or both. “d” homozygous for the BBDR-origin allele; “w” homozygous for the WF-origin alleles; “h” heterozygous.

## Appendix Table 4

TABLE 4

CANDIDATE GENES IN THE *Iddm20* INTERVAL

| Rat Chr | Rat Chr Start (bp) | Description                                            | Mouse Chr | Mouse Chr Start (bp) | Mouse <i>Idd14</i> region | Rat <i>Iddm20</i> |
|---------|--------------------|--------------------------------------------------------|-----------|----------------------|---------------------------|-------------------|
| 17      | 29713540           | PAK/PLC-interacting protein 1                          | 13        | 40443433             | idd14-NON                 |                   |
| 17      | 28451133           | Zinc finger protein 40 (Alpha A-crystallin-binding 1)  | 13        | 41502581             | idd14-NON                 |                   |
| 17      | 28306727           | Endothelin-1 precursor (ET-1).                         | 13        | 41748723             | idd14-NON                 |                   |
| 17      | 27138814           | NAD-dependent deacetylase sirtuin 5                    | 13        | 42822790             | idd14-NON                 | <i>Iddm20</i>     |
| 17      | 27046741           | RAN BP9; B cell antigen receptor Ig beta associated p1 | 13        | 42855480             | idd14-NON                 | <i>Iddm20</i>     |
| 17      | 26709913           | CD83 antigen.                                          | 13        | 43237577             | idd14-NON                 | <i>Iddm20</i>     |
| 17      |                    | Jumonji protein                                        | 13        | 44287373             | idd14-NON                 | <i>Iddm20</i>     |
| 17      |                    | Adenylyl cyclase-associated protein 2 (CAP 2).         | 13        | 46018959             | idd14-NON                 | <i>Iddm20</i>     |
| 17      | 23821596           | Kinesin-like protein KIF13A.                           | 13        | 46244160             | idd14-NON                 | <i>Iddm20</i>     |
| 17      | 23728906           | Malin                                                  | 13        | 46507913             | idd14-NON                 | <i>Iddm20</i>     |
| 17      | 23701239           | Thiopurine S-methyltransferase                         | 13        | 46519516             | idd14-NON                 | <i>Iddm20</i>     |
| 17      | 23634062           | DEK oncogene (DNA binding).                            | 13        | 46579123             | idd14-NON                 | <i>Iddm20</i>     |
| 17      |                    | RNP particle component (Fragment).                     | 13        | 47794113             | idd14-NON                 | <i>Iddm20</i>     |
| 17      | 21994289           | Homeobox protein BarH-like 1.                          | 13        | 48158986             | idd14-NON                 | <i>Iddm20</i>     |
| 17      | 21806043           | PHD finger protein 2 (GRC5).                           | 13        | 48298466             | idd14B6                   | <i>Iddm20</i>     |

| Rat Chr | Rat Chr Start (bp) | Description                                            | Mouse Chr | Mouse Chr Start (bp) | Mouse <i>Idd14</i> region | Rat <i>Iddm20</i>    |
|---------|--------------------|--------------------------------------------------------|-----------|----------------------|---------------------------|----------------------|
| 17      | 21410701           | Ninjurin 1 (Nerve injury-induced protein 1).           | 13        | 48685927             | idd14B6                   | <u><i>Iddm20</i></u> |
| 17      | 21015178           | Osteomodulin precursor (Osteoadherin) (OSAD)           | 13        | 49088364             | idd14B6                   | <u><i>Iddm20</i></u> |
| 17      | 19659967           | Sphingosine 1-phosphate receptor Edg-3                 | 13        | 50434260             | idd14B6                   | <u><i>Iddm20</i></u> |
| 17      | 19520647           | SHC transforming protein 3 (SH2 domain protein C3)     | 13        | 50457472             | idd14B6                   | <u><i>Iddm20</i></u> |
| 17      | 19423770           | Cyclin-dependent kinases regulatory subunit 2 (CKS-2). | 13        | 50672083             | idd14B6                   | <u><i>Iddm20</i></u> |
| 17      | 19352632           | Semaphorin 4D precursor                                | 13        | 50728006             | idd14B6                   | <u><i>Iddm20</i></u> |
| 17      | 19230896           | GADD45 gamma (Cytokine responsive protein)             | 13        | 50873436             | idd14B6                   | <u><i>Iddm20</i></u> |
| 17      | 18443785           | Tyrosine-protein kinase SYK (Spleen)                   | 13        | 51630629             | idd14B6                   | <u><i>Iddm20</i></u> |
| 17      | 18106038           | nuclear factor, interleukin 3, regulated.              | 13        | 52003799             | idd14B6                   |                      |
| 17      | 17736908           | Tyrosine-protein kinase ROR2 precursor 2.              | 13        | 52145865             | idd14B6                   |                      |
| 17      | 17243262           | Homeobox protein MSX-2 (Hox-8.1).                      | 13        | 52506491             | idd14B6                   |                      |
| 17      | 16655985           | D(1A) dopamine receptor.                               | 13        | 53096324             | idd14B6                   |                      |
| 17      | 16497967           | Histamine H2 receptor (H2R)                            | 13        | 53258774             | idd14B6                   |                      |
| 17      | 16094098           | ADP-ribosylation factor-like 10A                       | 13        | 53665747             | idd14B6                   |                      |
| 17      | 15595893           | Retinoid X receptor interacting protein 110.           | 13        | 54118171             | idd14B6                   |                      |

| Rat Chr | Rat Chr Start (bp) | Description                                               | Mouse Chr | Mouse Chr Start (bp) | Mouse <i>Idd14</i> region | Rat <i>Iddm20</i> |
|---------|--------------------|-----------------------------------------------------------|-----------|----------------------|---------------------------|-------------------|
| 17      | 15512144           | Fibroblast growth factor receptor 4 precursor             | 13        | 54244110             | idd14B6                   |                   |
| 17      | 15353521           | Ras-related protein Rab-24 (Rab-16).                      | 13        | 54409106             | idd14B6                   |                   |
| 17      | 15350379           | Px19-like protein.                                        | 13        | 54409802             | idd14B6                   |                   |
| 17      | 15346165           | Max dimerization protein 3.                               | 13        | 54414783             | idd14B6                   |                   |
| 17      | 15313303           | Vesicular integral-membrane protein VIP36 precursor       | 13        | 54432976             | idd14B6                   |                   |
| 17      | 15222027           | Regulator of G-protein signaling 14 (RGS14)               | 13        | 54459599             | idd14B6                   |                   |
| 17      | 15261698           | Profilin III.                                             | 13        | 54504680             | idd14B6                   |                   |
| 17      | 15251796           | coagulation factor XII (Hageman factor)                   | 13        | 54507774             | idd14B6                   |                   |
| 17      | 15194740           | Drebrin (Developmentally regulated brain protein).        | 13        | 54563349             | idd14B6                   |                   |
| 17      | 15147111           | DEAD (Asp-Glu-Ala-Asp) box polypeptide 41                 | 13        | 54627408             | idd14B6                   |                   |
| 17      | 15033873           | Calcium-signal modulating cyclophilin ligand (CAML).      | 13        | 54719996             | idd14B6                   |                   |
| 17      | 14834123           | Pituitary homeobox 1 (PtX1).                              | 13        | 54922627             | idd14B6                   |                   |
| 17      | 14286947           | Small inducible cytokine B14 precursor (CXCL14)           | 13        | 55389282             | idd14B6                   |                   |
| 17      | 14068757           | Interleukin-9 precursor (IL-9) (T-cell growth factor P40) | 13        | 55582311             | idd14B6                   |                   |
| 17      | 13995183           | Leukocyte cell-derived chemotaxin 2 precursor             | 13        | 55645800             | idd14B6                   |                   |

| Rat Chr | Rat Chr Start (bp) | Description                                          | Mouse Chr | Mouse Chr Start (bp) | Mouse <i>idd14</i> region | Rat <i>Iddm20</i> |
|---------|--------------------|------------------------------------------------------|-----------|----------------------|---------------------------|-------------------|
| 17      | 13905503           | transforming growth factor, beta induced 68kd        | 13        | 55712518             | idd14B6                   |                   |
| 17      | 13814377           | Mothers against decapentaplegic homolog 5 (SMAD5)    | 13        | 55808625             | idd14B6                   |                   |
| 17      | 13661202           | Short transient receptor potential channel 7 (TrpC7) | 13        | 55879544             | idd14B6                   |                   |

Table 4: Genes in the *Iddm20* interval. Abbreviations: *idd14*-NON is the interval determined in the NOD x NON cross (14) and *idd14B6* is the interval determined in the NOD x B6 crosses and congenic (15). The rat *Iddm20* supported interval  $\pm 1$  LOD is shown in gray shading. Chr: chromosome; bp: base pairs
